# Supplementary material for: A real-world observation of patients with glioblastoma treated with a personalized peptide vaccine
Source: PubMed Central journal article supplement — Nat Commun. 2024 Aug 11;15:6870. doi: 10.1038/s41467-024-51315-8 (PMC11316744; doi:10.1038/s41467-024-51315-8), 2024-08-11
Supplement: 41467_2024_51315_MOESM3_ESM.pdf [file 41467_2024_51315_MOESM3_ESM.pdf]

## Description of Additional Supplementary Files

**Supplementary Data 1:** Molecular characteristics of GBM patients with germline mutations described in this real-world observation.

Abbreviations: OS, overall survival; CPI, checkpoint inhibitor; IMM, immune monitoring; germline mutation denotes ACMG pathogenic/likely pathogenic germline mutation; HRD, homologous recombination deficiency; TMB, tumor mutational burden; MSI, microsatellite instability; RTK, receptor tyrosine kinase; U, unmethylated; M, methylated; m, male; f, female; x, presence; na, not available; empty box denotes absence.

**Supplementary Code 1:** R code for the propensity score matching and the multivariate analysis.

**Supplementary Code 2:** R code for the survival analysis, the univariate analysis, and the figures.
